# Supplementary material for: A NiMoS flower-like structure with self-assembled nanosheets as high-performance hydrodesulfurization catalysts
Source: Royal Society of Chemistry journal article supplement (doi:10.1039/c5nr08841k), 2016-01-01
Supplement: c5nr08841k1.pdf [file c5nr08841k1.pdf]

**Electronic Supplementary Information (ESI) for:**

**Defect-decorated NiMoS flower-like nanostructure with self-assembled nanosheets as high-performance hydrodesulfurization catalysts**

Weikun Lai, Zhou Chen, Jianping Zhu, Lefu Yang, Jinbao Zheng, Xiaodong Yi\* and Weiping Fang\*

*National Engineering Laboratory for Green Chemical Productions of Alcohols- ethers- esters, State Key Laboratory for Physical Chemistry of the Solid Surfaces, College of Chemistry and Chemical Engineering, Xiamen University, Xiamen 361005, China. Fax/Tel: +86-592-2186291; E-mail: [wpfang@xmu.edu.cn](mailto:wpfang@xmu.edu.cn); [xdyi@xmu.edu.cn](mailto:xdyi@xmu.edu.cn).*

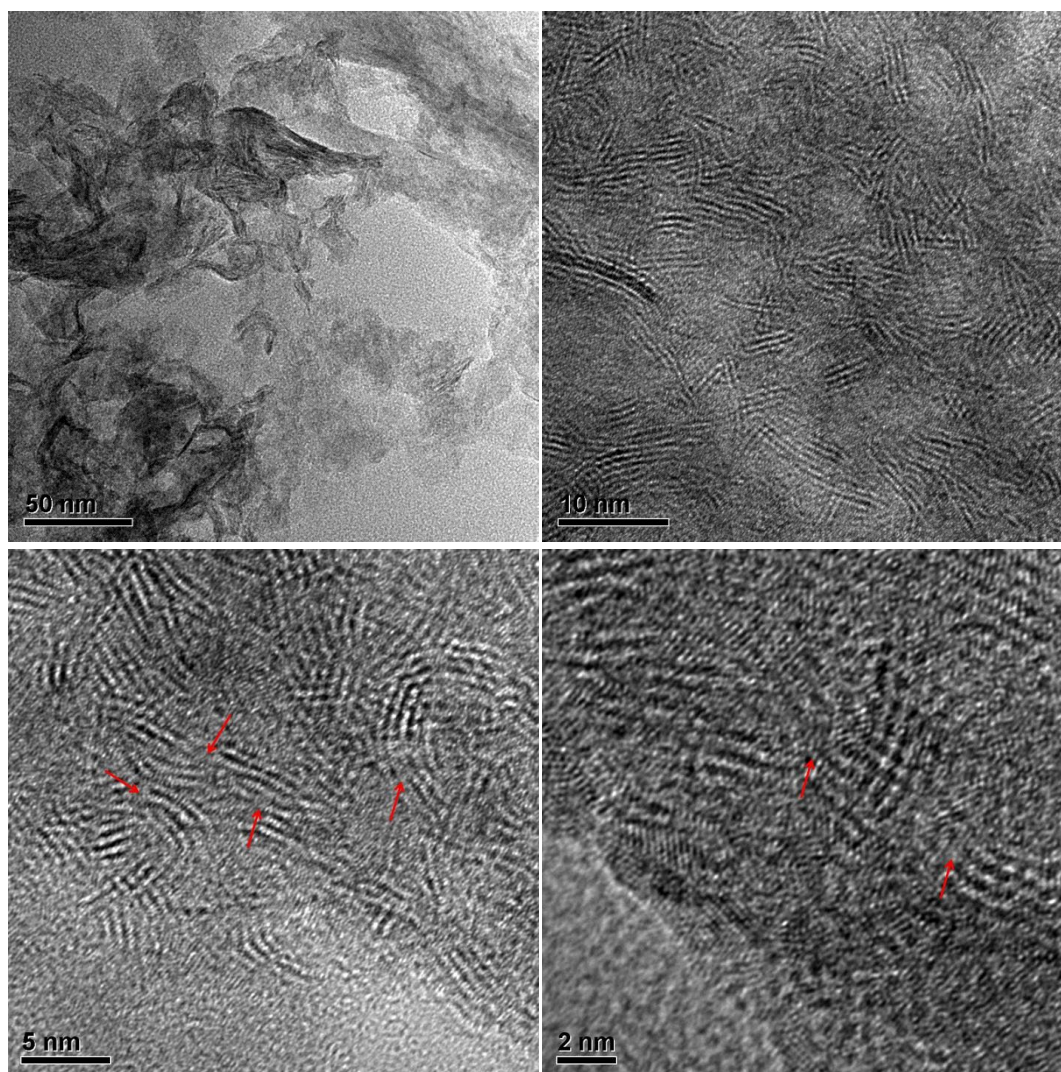

**Fig. S1** TEM images of the H<sub>2</sub> treated NiMoS-NSs sample with different magnification (Red arrows reflect the defect sites).

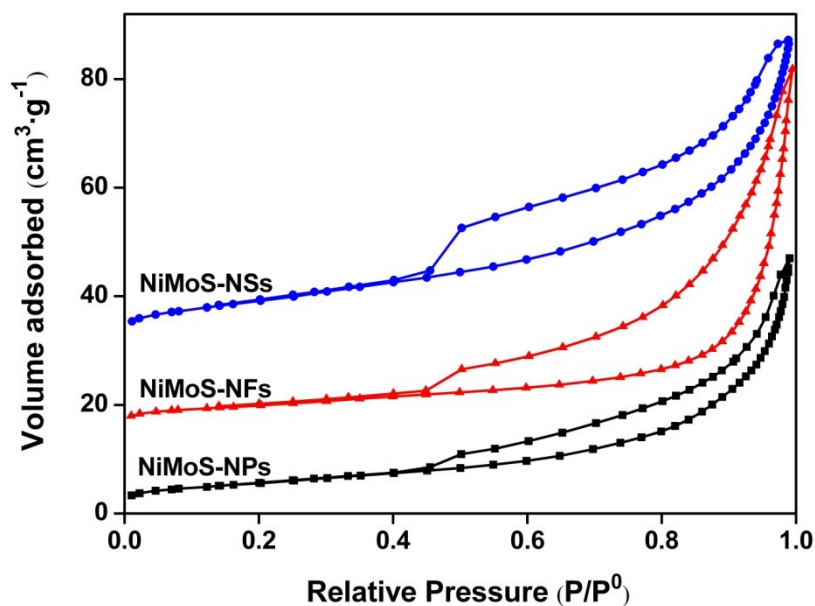

**Fig. S2** Nitrogen adsorption-desorption isotherms of the NiMoS samples.

**Table S1** XPS parameters of the different contributions of Mo 3d and Ni 2p.

| Sample    | Mo <sup>IV</sup> |        | Mo <sup>V</sup> |        | Mo <sup>VI</sup> |        |
|-----------|------------------|--------|-----------------|--------|------------------|--------|
|           | BE (eV)          | %atom. | BE (eV)         | %atom. | BE (eV)          | %atom. |
| NiMoS-NPs | 229.0            | 83.5   | 231.1           | 7.9    | 232.9            | 8.6    |
| NiMoS-NFs | 229.0            | 87.6   | 230.7           | 6.4    | 232.9            | 6.0    |
| NiMoS-NSs | 229.0            | 90.5   | 231.0           | 4.0    | 233.0            | 5.5    |

  

| Sample    | NiMoS   |        | NiS <sub>x</sub> |         | Ni (II) |         |
|-----------|---------|--------|------------------|---------|---------|---------|
|           | BE (eV) | %atom. | BE (eV)          | BE (eV) | %atom.  | BE (eV) |
| NiMoS-NPs | 853.4   | 57.8   | 852.9            | 22.2    | 855.9   | 20.0    |
| NiMoS-NFs | 853.6   | 62.2   | 852.9            | 20.0    | 855.8   | 17.8    |
| NiMoS-NSs | 853.5   | 64.5   | 852.9            | 18.1    | 855.8   | 17.4    |

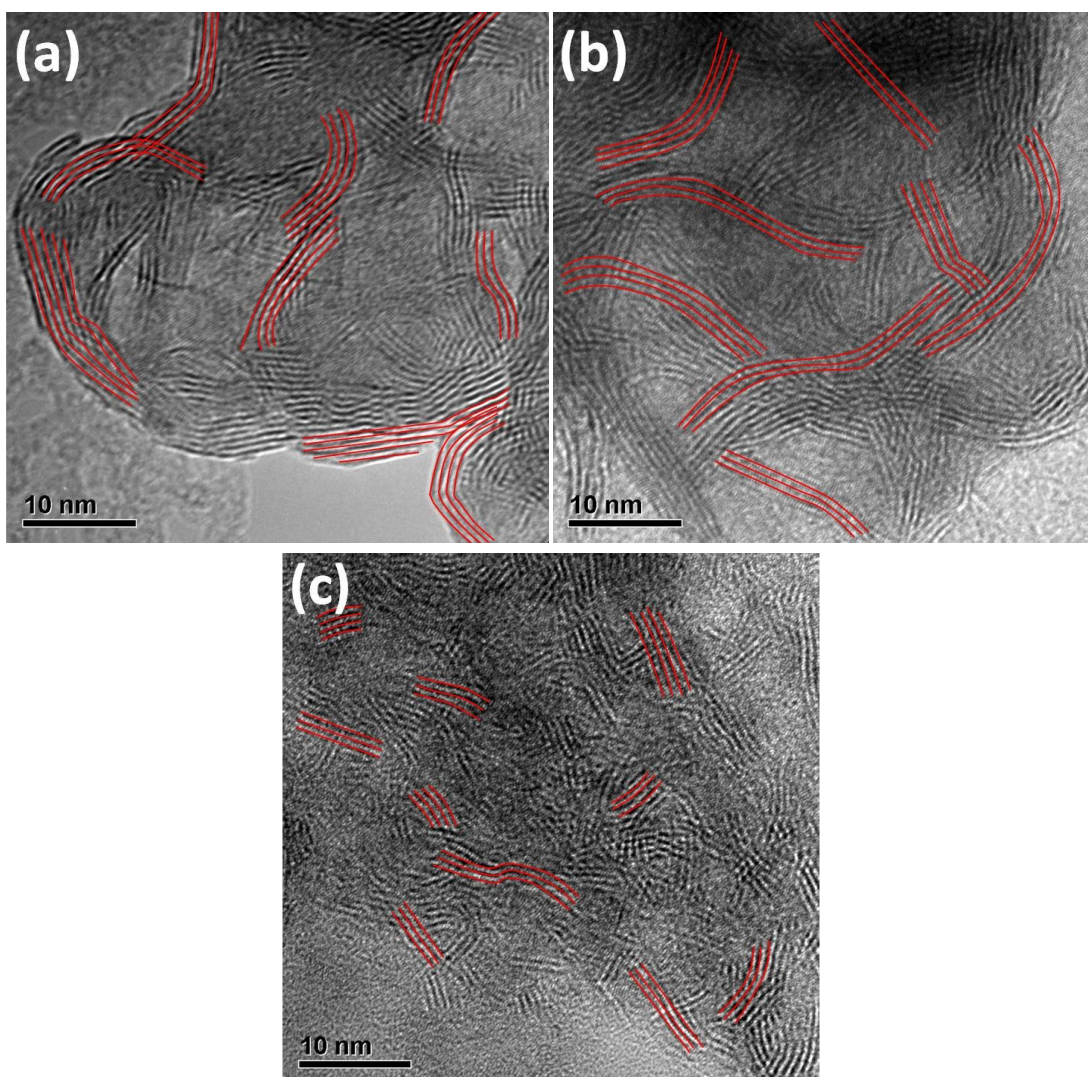

**Fig. S3** Schematic diagram of the statistical slabs lengths obtained by TEM images: (a) NiMoS-NPs; (b) NiMoS-NFs; (c) NiMoS-NSs. The MoS<sub>2</sub> fringes were marked as red line, and a piece of software called 'SigmaScan Pro 4' was used to measure the lengths of the marked red line, finally, the measured lengths of the red line were normalized scale bar (10 nm) to obtain actual MoS<sub>2</sub> slabs lengths. Otherwise, the stacking layer numbers were obtained via counting the layer number of the MoS<sub>2</sub> cluster (one by one).



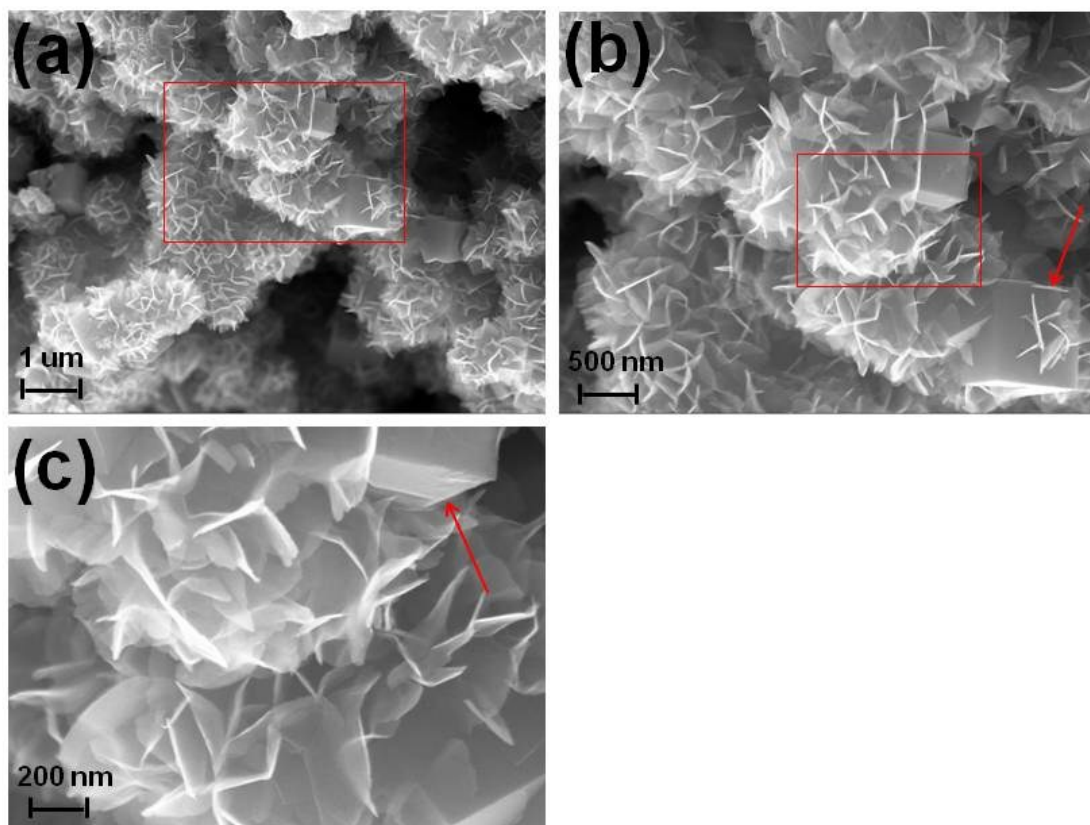

**Fig. S4** FESEM images of NiMoS-Nanosheets(NSs) sample: (a) low magnification image, (b) enlarged view of the red rectangle in image 'a', (c) enlarged view of the red rectangle in image 'b' (Red arrows reflect the  $\text{Ni}_3\text{S}_2$  crystals).

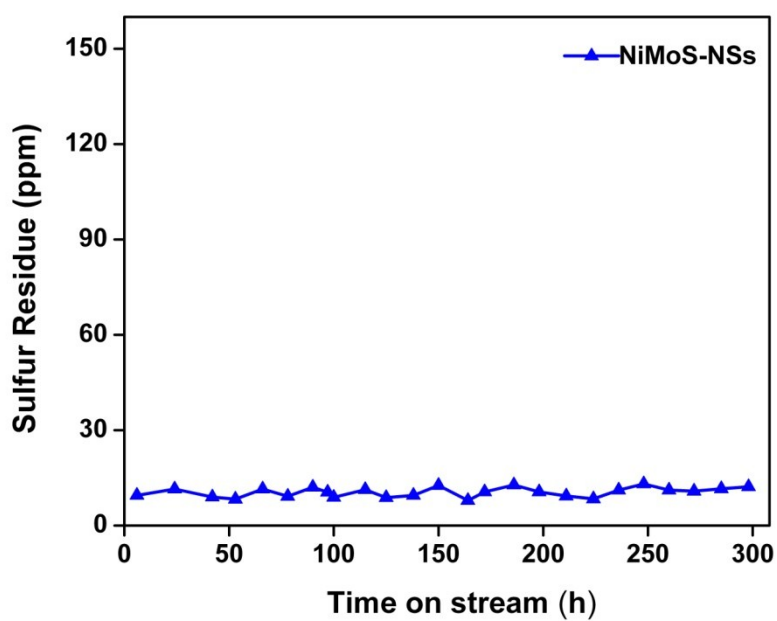

**Fig. S5** Sulfur residue in the product with time on stream over the NiMoS-NSs catalyst under reaction conditions of  $\text{H}_2/\text{oil} = 600$ ,  $\text{LHSV} = 4 \text{ h}^{-1}$  and  $\text{H}_2$  pressure of 3.0 MPa at 350 °C.

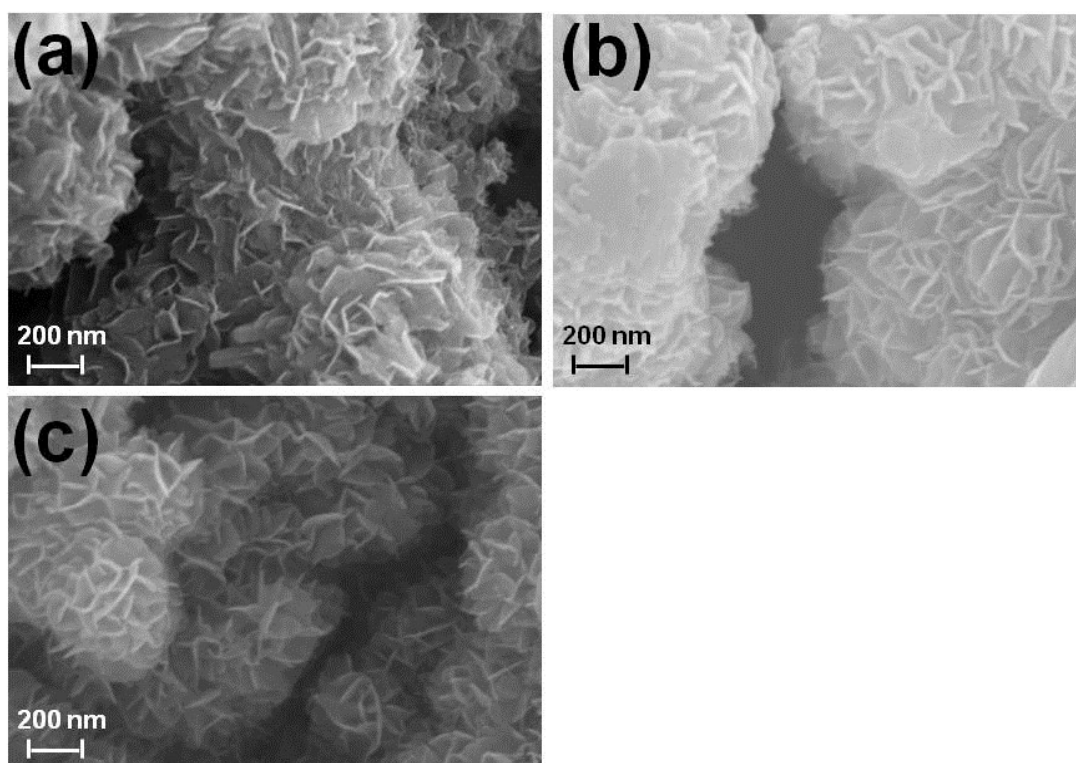

**Fig. S6** FESEM images of NiMoS-NSs sample with various hydrazine hydrate (HHA) addition: (a) HHA/Mo=8, (b) HHA/Mo=14, (c) HHA/Mo=22.

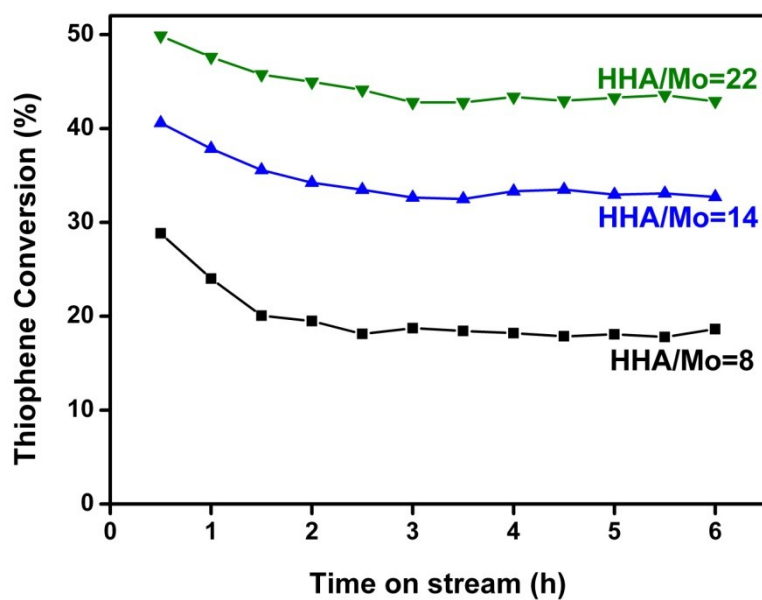

**Fig. S7** Thiophene HDS results of NiMoS-NSs catalysts with various hydrazine hydrate (HHA) addition under reaction conditions of  $H_2$ /thiophene=7,  $F/m=2.8 \times 10^{-5} \text{ mol} \cdot \text{g}^{-1} \cdot \text{s}^{-1}$  and temperature of 250 °C at atmosphere.
